# Supplementary material for: Molecular Population Genetics of Aspen Mosaic-Associated Virus in Finland and Sweden
Source: MDPI journal article supplement (doi:10.3390/v15081678), 2023-08-01
Supplement: s1 [file s1]

**Supplementary Table S2.** Characteristics of the oligonucleotides used in this study. The RNA1 to RNA5 sequences of AsMaV isolates E55089 (GenBank accession No. LR74246, LR742462–65) were used for hybridization regions of the primers to the genomic cRNAs.

| Primer name                 | Sequence 5' → 3'                       | RNA Position |                                                         | Reference  |
|-----------------------------|----------------------------------------|--------------|---------------------------------------------------------|------------|
| Primers used for detection  |                                        |              |                                                         |            |
| motif-A-sense               | GATGCATCDAAATGGTCWGC                   | 1            | 3436–3455                                               | [47]       |
| motif-C-antisense           | ATCATCWGARTGHACCAT                     | 1            | 3822–3805                                               | [47]       |
| AsMaV1-F                    | GATGATTATCTCCTAACTAGG                  | 1            | 5583–5563                                               | [5]        |
| AsMaV1-R                    | GTGATGGCCTGTTAAGAATTC                  | 1            | 5790–5770                                               | [5]        |
| AsMaV2-F                    | CAATATCAATCTGTAAGGGTG                  | 2            | 272–292                                                 | [5]        |
| AsMaV2-R                    | CATTGTCATCAGCCTTGACG                   | 2            | 634–615                                                 | [5]        |
| AsMaV3-F                    | GAGAAGCCTCAGATTTACTGA                  | 3            | 202–222                                                 | [5]        |
| AsMaV3-R                    | CACATGCTTTGTTGAATGAGAC                 | 3            | 518–397                                                 | [5]        |
| AsMaV4-F                    | GTTCCCAAGTACGAGTGGAA                   | 4            | 125–144                                                 | [5]        |
| AsMaV4-R                    | AGTGTTGCCATCTCCTGGA                    | 4            | 412–394                                                 | [5]        |
| AsMaV5-F                    | ATGGAGCTAAAAGCGTTCGAA                  | 5            | 70–90                                                   | [5]        |
| AsMaV5-R                    | GAACAACCTTGCTTCTTGGTCT                 | 5            | 714–694                                                 | [5]        |
| Primers used for cloning    |                                        |              |                                                         |            |
| PDAP213                     | GGCGACCCGCTCCGGTACCCTAGTAG<br>TGAACTCC | 1–5          | 13 conserved<br>terminal<br>nucleotides<br>(underlined) | [48]       |
| AsMaV-R1AandE-1-s           | AGTAGTGAACTCCCTTTAATAC                 | 1            | 1–22                                                    | This study |
| AsMaV-R1A-1627-as           | CACTCACCAGATCATTTCG                    | 1            | 1645–1627                                               | This study |
| AsMaV-R1B-1541-s            | CCATGGCTGATTCAGAGAACG                  | 1            | 1541–1561                                               | This study |
| AsMaV-R1B-3107-as           | TGGTATTCATCAACGAGTC                    | 1            | 3107–3125                                               | This study |
| AsMaV-R1C-2808-s            | TGACAATATRGACATACATGCA                 | 1            | 2808–2829                                               | This study |
| AsMaV-R1C-4692-as           | CTTYTTYACACACCATTTCAGGA                | 1            | 4692–4713                                               | This study |
| AsMaV-R1D-4435-s            | ATACAGGATTATCTAGATCTC                  | 1            | 4435–4455                                               | This study |
| AsMaV-R1D-6011-as           | TTTTGTTGGCTAAATGTCC                    | 1            | 6011–6029                                               | This study |
| AsMaV-R1E-5968-s            | TCTCTATCRTATTACATGTG                   | 1            | 5968–5987                                               | This study |
| AsMaV-RNA3-18-s             | CCAGTAGTGAACTCCCATTA                   | 3            | 1–18                                                    | This study |
| AsMaV-RNA3-end-as           | AGTAGTGAACTCCCATTATAC                  | 3            | 1587–1569                                               | This study |
| AsMaV-RNA4-12-s             | CCTTACAACAAGAATCAACTG                  | 4            | 12–32                                                   | This study |
| AsMaV-RNA4-end-as           | AGATCTAGTAGTGAACTCCTTAC                | 4            | 1558–1541                                               | This study |
| Primers used for sequencing |                                        |              |                                                         |            |
| AsMaV-R2-897-s              | CAGAAAGGCTCATGATGGGT                   | 2            | 897–916                                                 | This study |
| AsMaV-R3-753-s              | TGAGGCTAGAGTACAGGAAG                   | 3            | 753–772                                                 | This study |
| AsMaV-R3-962-as             | GACCTCTATAGCATCATCATT                  | 3            | 962–982                                                 | This study |
| AsMaV-R4-845-as             | GAGAGAAGTTGTTTCAGCTGC                  | 4            | 845–864                                                 | This study |
| AsMaV-R4-745-s              | GACTCCCTGCTGAAATTGAGC                  | 4            | 745–765                                                 | This study |
