# Supplementary material for: Molecular Population Genetics of Aspen Mosaic-Associated Virus in Finland and Sweden
Source: MDPI journal article supplement (doi:10.3390/v15081678), 2023-08-01
Supplement: s1 [file s1]

**Supplementary Table S3. (a):** the GenBank accession numbers of the isolates sequenced in this study.

| Isolate | Country | Isolation source         | GenBank Accession |          |              |
|---------|---------|--------------------------|-------------------|----------|--------------|
|         |         |                          | RNA3              | RNA4     | partial RNA1 |
| E58191  | Sweden  | Skede-Kråkshult          | OQ627809          | -----    | -----        |
| E58209  | Sweden  | Ångelsjön Nature Reserve | OQ627810          | OQ627834 | OQ627858     |
| E58213  | Sweden  | Ångelsjön Nature Reserve | OQ627811          | OQ627835 | OQ627859     |
| E58227  | Sweden  | Fagertårn-road           | OQ627812          | OQ627836 | OQ627860     |
| E58229  | Sweden  | Fagertårn-road           | OQ627813          | OQ627837 | OQ627861     |
| E58247  | Sweden  | Sunnersberg-Fiskbäck     | OQ627814          | OQ627838 | OQ627862     |
| E58299  | Sweden  | Stora-Anrås              | OQ627815          | OQ627839 | OQ627863     |
| E58306  | Sweden  | Boliden                  | OQ627816          | OQ627840 | OQ627864     |
| E58377  | Finland | Oikarainen-Rovaniemi     | OQ627817          | OQ627841 | OQ627865     |
| E58385  | Finland | Hyypiöoja-Rovaniemi      | OQ627818          | OQ627842 | OQ627866     |
| E58386  | Finland | Hyypiöoja-Rovaniemi      | OQ627819          | OQ627843 | OQ627867     |
| E58389  | Finland | Hyypiöoja-Rovaniemi      | OQ627820          | OQ627844 | OQ627868     |
| E58397  | Finland | Lustila-Rovaniemi        | OQ627821          | OQ627845 | OQ627869     |
| E58398  | Finland | Lustila-Rovaniemi        | OQ627822          | OQ627846 | OQ627870     |
| E58405  | Finland | Kivitaipale-Rovaniemi    | OQ627823          | OQ627847 | OQ627871     |
| E58413  | Finland | Petäjäinen-Rovaniemi     | OQ627824          | OQ627848 | OQ627872     |
| E58421  | Finland | Mattinen-Tervola         | OQ627825          | OQ627849 | OQ627873     |
| E58426  | Finland | Mattinen-Tervola         | OQ627826          | OQ627850 | OQ627874     |
| E58433  | Finland | Maula-Keminmaa           | OQ627827          | OQ627851 | OQ627875     |
| E58434  | Finland | Maula-Keminmaa           | OQ627828          | OQ627852 | OQ627876     |
| E58439  | Finland | Lautiosaari-Keminmaa     | OQ627829          | OQ627853 | OQ627877     |
| E58446  | Finland | Ritikka-Kemi             | OQ627830          | OQ627854 | OQ627878     |
| E58491  | Finland | Kuninkaansaari-Helsinki  | OQ627831          | OQ627855 | OQ627879     |
| E58627  | Finland | Kuninkaansaari-Helsinki  | OQ627832          | OQ627856 | OQ627880     |
| E58632  | Finland | Vallisaari-Helsinki      | OQ627833          | OQ627857 | OQ627881     |
| E57260  | Finland | Hyypiökivalo             | OQ858388          | OQ858389 | OQ858387     |

**(b):** the GenBank Accession numbers for the complete genome.

| Isolate | Country | Isolation source        | genomic region | Acc. No. |
|---------|---------|-------------------------|----------------|----------|
| E58627  | Finland | Kuninkaansaari-Helsinki | RNA1           | OQ644804 |
| E58627  | Finland | Kuninkaansaari-Helsinki | RNA2           | OQ644805 |
| E58627  | Finland | Kuninkaansaari-Helsinki | RNA3           | OQ644806 |
| E58627  | Finland | Kuninkaansaari-Helsinki | RNA4           | OQ644807 |
| E58627  | Finland | Kuninkaansaari-Helsinki | RNA5           | OQ644808 |
| E58632  | Finland | Vallisaari-Helsinki     | RNA1           | OQ725028 |
| E58632  | Finland | Vallisaari-Helsinki     | RNA2           | OQ725029 |
| E58632  | Finland | Vallisaari-Helsinki     | RNA3           | OQ627833 |
| E58632  | Finland | Vallisaari-Helsinki     | RNA4           | OQ627857 |
| E58632  | Finland | Vallisaari-Helsinki     | RNA5           | OQ725030 |
